# Supplementary material for: Persistent mental health burden following climate-change–related extreme rainfall: Repeated cross-sectional population surveys in a flood-naïve region of Japan
Source: Research Square preprint supplement (doi:10.21203/rs.3.rs-8495344/v1), 2026-01-21
Supplement: Supplementary file 1 [file d44ba27c473d5a184b479246.xlsx]

## Sheet: Sheet1
	Supplementary Table S1. Spearman’s rank correlations (ρ) between age and psychological indicators at 3, 6, 9, and 12 months after the 2023 Akita heavy rainfall.
	Months after disaster	N	Insomnia			DASS-21 Depression			DASS-21 Anxiety			DASS-21 Stress			IES-R PTSD
			ρ	p		ρ	p		ρ	p		ρ	p		ρ	p
	3 months	400	-0.17	0.001		-0.16	0.001		-0.18	< 0.001		-0.16	0.001		-
	6 months	800	-0.11	0.002		-0.15	< 0.001		-0.16	< 0.001		-0.15	< 0.001		-0.11	0.002
	9 months	800				-0.06	0.009		-0.06	0.11		-0.04	0.228		-0.02	0.597
	12 months	1000				-0.12	< 0.001		-0.16	< 0.001		-0.14	< 0.001		-0.04	0.269
	ρ = Spearman’s correlation coefficient. All tests two-tailed.
